# Supplementary material for: Optimization of Hormonal Compositions of Media in In Vitro Propagation of Orange Cultivars from Shoot Tip Nodal Segments
Source: Hindawi journal article supplement (doi:10.1155/2023/3581881), 2023-06-28
Supplement: f1 [file 3581881.f1.pdf]

Table 1. MS medium preparation from basal salts

| Micronutrients                                     | mg/L (1x)    | Volume needed in 500ml medium | Final working medium (in 500ml sola)                            |
|----------------------------------------------------|--------------|-------------------------------|-----------------------------------------------------------------|
| (MS stock sola A)                                  |              |                               |                                                                 |
| NH <sub>4</sub> NO <sub>3</sub>                    | 1650mg=1.65g | 50ml                          | 50ml sola A + 5ml sola B + 5ml sola C + 450ml dH <sub>2</sub> O |
| KNO <sub>3</sub>                                   | 600mg=0.6g   |                               |                                                                 |
| CaCl <sub>2</sub> ·2H <sub>2</sub> O               | 450mg=0.45g  |                               |                                                                 |
| MgSO <sub>4</sub> ·7H <sub>2</sub> O               | 370mg=0.37g  |                               |                                                                 |
| KH <sub>2</sub> PO <sub>4</sub>                    | 170=0.17g    |                               |                                                                 |
| Micronutrients                                     | mg/L (1x)    |                               |                                                                 |
| (MS stock sola B)                                  |              |                               |                                                                 |
| H <sub>2</sub> BO <sub>3</sub>                     | 6.2mg        | 5ml                           |                                                                 |
| Na <sub>2</sub> SO <sub>4</sub> ·4H <sub>2</sub> O | 22.3mg       |                               |                                                                 |
| ZnSO <sub>4</sub> ·7H <sub>2</sub> O               | 8.6mg        |                               |                                                                 |
| KI                                                 | 0.83mg       |                               |                                                                 |
| NaMoO <sub>4</sub> ·H <sub>2</sub> O               | 0.25mg       |                               |                                                                 |
| CoCl <sub>2</sub> ·12H <sub>2</sub> O              | 0.025mg      |                               |                                                                 |
| CuSO <sub>4</sub> ·5H <sub>2</sub> O               | 0.025mg      |                               |                                                                 |
| Iron stock solution                                | Mg/L (1x)    |                               |                                                                 |
| (MS stock sola C)                                  |              |                               |                                                                 |
| NaEDTA                                             | 27.25        | 5ml                           |                                                                 |
| FeSO <sub>4</sub> ·7H <sub>2</sub> O               | 27.85        |                               |                                                                 |
| Vitamins                                           | Mg/L (1x)    |                               |                                                                 |
| (MS stock sola D)                                  |              |                               |                                                                 |
| Vit B complex                                      | 1mg          | 5ml                           | Poured                                                          |
| Glycine                                            | 2mg          | Not autoclaved                |                                                                 |
| Myoinositol                                        | 100mg        | Instead it is filtered        |                                                                 |

Table 2. The effect of MS supplemented with IAA and kinetin on shoot regeneration of sweet orange cultivars

| Cultivar   | IAA | Rep | IAA/Kin     | Shoot proliferation rate (%) | Shoot number per explant | Shoot length (cm) | Leaf number/c explant | Initiation date |
|------------|-----|-----|-------------|------------------------------|--------------------------|-------------------|-----------------------|-----------------|
| Washington | Wa  | 1   | 0.00 + 0.00 | 0                            | 0                        | 0                 | 0                     | 0               |
| Washington | Wa  | 2   | 0.00 + 0.01 | 0                            | 0                        | 0                 | 0                     | 0               |
| Washington | Wa  | 3   | 1.00 + 0.00 | 40                           | 1.3                      | 6                 | 3                     | 12              |
| Washington | Wa  | 4   | 1.00 + 0.01 | 43                           | 1.5                      | 5.9               | 1.6                   | 12              |
| Washington | Wa  | 5   | 1.00 + 1.50 | 96                           | 2                        | 6.2               | 9.2                   | 7               |
| Washington | Wa  | 6   | 1.00 + 1.51 | 95.4                         | 2.2                      | 6.5               | 9.1                   | 10              |
| Washington | Wa  | 7   | 1.20 + 2.00 | 100                          | 3.1                      | 10.4              | 12                    | 8               |
| Washington | Wa  | 8   | 1.20 + 2.01 | 99.5                         | 3                        | 11                | 11                    | 8               |
| Washington | Wa  | 9   | 1.20 + 2.50 | 98                           | 3                        | 9.8               | 10.8                  | 9               |
| Washington | Wa  | 10  | 1.20 + 2.51 | 97.6                         | 3.2                      | 10                | 11                    | 9               |
| Valencia   | Va  | 1   | 0.00 + 0.00 | 0                            | 0                        | 0                 | 0                     | 0               |
| Valencia   | Va  | 2   | 0.00 + 0.01 | 0                            | 0                        | 0                 | 0                     | 0               |
| Valencia   | Va  | 3   | 1.00 + 0.00 | 15.5                         | 1                        | 3                 | 3                     | 20              |
| Valencia   | Va  | 4   | 1.00 + 0.01 | 16                           | 1.5                      | 3.2               | 6.1                   | 18              |
| Valencia   | Va  | 5   | 1.00 + 1.50 | 60.2                         | 2                        | 6.6               | 6.7                   | 17              |
| Valencia   | Va  | 6   | 1.00 + 1.51 | 61.1                         | 2.1                      | 3.5               | 7.1                   | 15              |
| Valencia   | Va  | 7   | 1.20 + 2.00 | 67                           | 2                        | 6.5               | 8                     | 14              |
| Valencia   | Va  | 8   | 1.20 + 2.01 | 68.2                         | 2.4                      | 7.2               | 7.8                   | 15              |
| Valencia   | Va  | 9   | 1.20 + 2.50 | 65.8                         | 2.4                      | 6.5               | 8.2                   | 15              |
| Valencia   | Va  | 10  | 1.20 + 2.51 | 72                           | 1                        | 7.1               | 8.2                   | 17              |
| Tangelo    | Ta  | 1   | 0.00 + 0.00 | 0                            | 0                        | 0                 | 0                     | 0               |
| Tangelo    | Ta  | 2   | 0.00 + 0.01 | 0                            | 0                        | 0                 | 0                     | 0               |
| Tangelo    | Ta  | 3   | 1.00 + 0.00 | 32.4                         | 1                        | 5                 | 7.4                   | 20              |
| Tangelo    | Ta  | 4   | 1.00 + 0.01 | 36                           | 1.3                      | 6.8               | 8                     | 18              |
| Tangelo    | Ta  | 5   | 1.00 + 1.50 | 85.4                         | 1                        | 8                 | 16                    | 16              |
| Tangelo    | Ta  | 6   | 1.00 + 1.51 | 86                           | 1.4                      | 6.5               | 8.2                   | 15              |
| Tangelo    | Ta  | 7   | 1.20 + 2.00 | 88.2                         | 2                        | 9.5               | 10                    | 14              |
| Tangelo    | Ta  | 8   | 1.20 + 2.01 | 90                           | 1.7                      | 10.4              | 11.2                  | 13              |
| Tangelo    | Ta  | 9   | 1.20 + 2.50 | 87.5                         | 1                        | 8                 | 16                    | 18              |
| Tangelo    | Ta  | 10  | 1.20 + 2.51 | 88.1                         | 1.1                      | 9.2               | 11                    | 16.1            |

Table 3. The effect of MS supplemented with IAA on rooting response microshoots from nodal segment explants of sweet orange

| Cultivar   | MS-IAA | Rep | IAA (mg/L) | Rooting rate (%) | Root number per explant | Root length (cm) |
|------------|--------|-----|------------|------------------|-------------------------|------------------|
| Washington | Wa     | 1   | 0          | 0                | 0                       | 0                |
| Washington | Wa     | 2   | 0.0        | 0                | 0                       | 0                |
| Washington | Wa     | 3   | 0.3        | 50.1             | 3.2                     | 1.8              |
| Washington | Wa     | 4   | 0.3        | 52.3             | 3.28                    | 1.76             |
| Washington | Wa     | 5   | 0.5        | 65.8             | 3.8                     | 2.1              |
| Washington | Wa     | 6   | 0.5        | 70.52            | 4.3                     | 2.4              |
| Washington | Wa     | 7   | 1.0        | 70.2             | 4.1                     | 2.6              |
| Washington | Wa     | 8   | 1.0        | 68.9             | 4.2                     | 2.8              |
| Washington | Wa     | 9   | 1.5        | 82.4             | 4.8                     | 2.8              |
| Washington | Wa     | 10  | 1.5        | 86.1             | 5.1                     | 3.1              |
| Valencia   | Va     | 1   | 0          | 0                | 0                       | 0                |
| Valencia   | Va     | 2   | 0.0        | 0                | 0                       | 0                |
| Valencia   | Va     | 3   | 0.3        | 19.3             | 1.1                     | 1.2              |
| Valencia   | Va     | 4   | 0.3        | 20.5             | 2.25                    | 1.14             |
| Valencia   | Va     | 5   | 0.5        | 44.2             | 2.6                     | 0.7              |
| Valencia   | Va     | 6   | 0.5        | 45.2             | 2.71                    | 0.89             |
| Valencia   | Va     | 7   | 1.0        | 40.8             | 3.2                     | 2.3              |
| Valencia   | Va     | 8   | 1.0        | 42.3             | 3.31                    | 2.27             |
| Valencia   | Va     | 9   | 1.5        | 48.6             | 3.5                     | 2.2              |
| Valencia   | Va     | 10  | 1.5        | 48.3             | 3.59                    | 2.32             |
| Tangelo    | Ta     | 1   | 0          | 0                | 0                       | 0                |
| Tangelo    | Ta     | 2   | 0.0        | 0                | 0                       | 0                |
| Tangelo    | Ta     | 3   | 0.3        | 25.6             | 2.5                     | 1.4              |
| Tangelo    | Ta     | 4   | 0.3        | 26.4             | 2.57                    | 1.39             |
| Tangelo    | Ta     | 5   | 0.5        | 48.7             | 3.3                     | 1.9              |
| Tangelo    | Ta     | 6   | 0.5        | 47               | 3.21                    | 2.12             |
| Tangelo    | Ta     | 7   | 1.0        | 40.3             | 3.9                     | 1.9              |
| Tangelo    | Ta     | 8   | 1.0        | 49.2             | 4.1                     | 2.12             |
| Tangelo    | Ta     | 9   | 1.5        | 56.2             | 4.6                     | 2.1              |
| Tangelo    | Ta     | 10  | 1.5        | 55.8             | 4.52                    | 2.2              |

Table 4. The effect of MS supplemented with IAA on rooting response microshoots from nodal segment explants of sweet orange cultivars

| Cultivar   | NAA | Rep | Rooting rate (%) | Root number per explant | Root length (cm) |
|------------|-----|-----|------------------|-------------------------|------------------|
| Washington | 0   | 1   | 0                | 0                       | 0                |
| Washington | 0   | 2   | 0                | 0                       | 0                |
| Washington | 0.3 | 1   | 56.4             | 3.6                     | 2.1              |
| Washington | 0.3 | 2   | 58.3             | 3.78                    | 2.34             |
| Washington | 0.5 | 1   | 68.8             | 4                       | 2.45             |
| Washington | 0.5 | 2   | 70.52            | 4.3                     | 2.4              |
| Washington | 1   | 1   | 72.2             | 4.8                     | 2.6              |
| Washington | 1   | 2   | 73               | 4.2                     | 2.8              |
| Washington | 1.5 | 1   | 84.7             | 5.3                     | 3                |
| Washington | 1.5 | 2   | 85.1             | 5.1                     | 3.1              |
| Valencia   | 0   | 1   | 0                | 0                       | 0                |
| Valencia   | 0   | 2   | 0                | 0                       | 0                |
| Valencia   | 0.3 | 1   | 26.4             | 2.6                     | 1.7              |
| Valencia   | 0.3 | 2   | 25.5             | 2.65                    | 1.74             |
| Valencia   | 0.5 | 1   | 50.9             | 3.3                     | 2.1              |
| Valencia   | 0.5 | 2   | 48.2             | 3.3                     | 2.1              |
| Valencia   | 1   | 1   | 55.8             | 4.1                     | 2.3              |
| Valencia   | 1   | 2   | 54.3             | 4.31                    | 2.27             |
| Valencia   | 1.5 | 1   | 59.6             | 4.8                     | 2.65             |
| Valencia   | 1.5 | 2   | 58.3             | 4.91                    | 2.7              |
| Tangelo    | 0   | 1   | 0                | 0                       | 0                |
| Tangelo    | 0   | 2   | 0                | 0                       | 0                |
| Tangelo    | 0.3 | 1   | 52.2             | 2.8                     | 1.7              |
| Tangelo    | 0.3 | 2   | 53.1             | 2.88                    | 1.78             |
| Tangelo    | 0.5 | 1   | 50.9             | 3.2                     | 2.2              |
| Tangelo    | 0.5 | 2   | 51.2             | 3.45                    | 2.18             |
| Tangelo    | 1   | 1   | 52.3             | 4.2                     | 2.3              |
| Tangelo    | 1   | 2   | 49.2             | 4.1                     | 2.21             |
| Tangelo    | 1.5 | 1   | 63.5             | 5.5                     | 2.8              |
| Tangelo    | 1.5 | 2   | 65.8             | 5.52                    | 2.48             |

Table 5. Comparison of IAA and NAA on rooting of microshoots from shoot tip nodal segment explants of three orange cultivars

| Response | Washington Nerval cultivar          |        |        | Valencia cultivar                   |        |        | Tangelo cultivar                    |        |        |        |        |        |
|----------|-------------------------------------|--------|--------|-------------------------------------|--------|--------|-------------------------------------|--------|--------|--------|--------|--------|
|          | Concentrations of IAA or NAA (mg/L) |        |        | Concentrations of IAA or NAA (mg/L) |        |        | Concentrations of IAA or NAA (mg/L) |        |        |        |        |        |
| RR       | 51.20b                              | 68.76a | 69.55b | 81.25b                              | 20.00b | 44.70b | 41.55b                              | 48.45b | 26.00b | 47.85b | 49.75a | 56.00b |
| RN       | 57.35a                              | 69.66a | 72.60a | 84.90a                              | 25.95a | 49.20a | 55.05a                              | 58.95a | 32.65a | 51.05a | 50.75a | 64.15a |
| RNI      | 3.24a                               | 4.05b  | 4.15b  | 4.95c                               | 2.18c  | 2.66c  | 3.26cd                              | 3.55d  | 2.56cd | 3.26cd | 4.00b  | 4.56cd |
| RNI      | 3.09c                               | 4.19b  | 4.50c  | 5.20c                               | 2.65c  | 3.20c  | 4.21c                               | 4.86c  | 2.84c  | 3.48c  | 4.15b  | 5.51c  |
| RL       | 1.78c                               | 2.25b  | 2.70a  | 2.98d                               | 1.17d  | 1.80c  | 2.20d                               | 2.26c  | 1.40c  | 2.01d  | 2.06b  | 2.15d  |
| RLI      | 2.22b                               | 2.43b  | 2.70a  | 3.05d                               | 1.72d  | 2.05c  | 2.20d                               | 2.68cd | 1.74cd | 2.19d  | 2.20b  | 2.44d  |

Means followed by the same letter within a column were not significantly different at 0.05 probability level based on Least Significance Difference (LSD) test. Small letters significance within a column. Where RRE: rooting rate due to IAA supplement; RRN: rooting rate due to NAA supplement; RNI: root number due to IAA supplement; RNI: root number due to NAA supplement; RRL: rooting length due to IAA supplement; RLI: root length due to NAA supplement.
